# Supplementary material for: The Development and Validation of the Firesetting Questionnaire
Source: Springer Nature journal article supplement (doi:10.1007/s10862-022-10011-x), 2022-12-16

Supplemental Table S1

*Firesetting Questionnaire Item Analysis Statistics (N = 1,402)*

| **Firesetting Questionnaire Item** | **Item Mean** | **Item SD** | **Scale Mean if Item Deleted** | **Corrected Item-Total Correlation** | **Cronbach's Alpha if Item Deleted** |
| --- | --- | --- | --- | --- | --- |
| FFS1 Most people's friends have lit a fire or two | 2.1633 | 1.12324 | 176.0842 | .433 | .963 |
| FFS3 Most people have been questioned about fires by the police | 1.3944 | .71831 | 176.8531 | .208 | .963 |
| FFS6 Most people have set a few small fires just for fun | 2.0621 | 1.14152 | 176.1854 | .442 | .963 |
| FFS8 Most families have had a fire accident at home | 2.1469 | .95947 | 176.1006 | .260 | .963 |
| NFQ11 All people have misused fire as an adult at some point in their lives | 1.7347 | .90887 | 176.5128 | .460 | .963 |
| FFS21 I have to have fire in my life | 1.6013 | .87152 | 176.6462 | .536 | .963 |
| FFS22 Fire is a part of me | 1.3395 | .64253 | 176.9080 | .608 | .963 |
| FFS23 Without fire, I am nobody | 1.1655 | .47161 | 177.0820 | .394 | .963 |
| FFS24 I need fire in my life | 1.6805 | .96063 | 176.5670 | .502 | .963 |
| FFS26 Fire is an important part of my life | 1.5392 | .82187 | 176.7083 | .566 | .963 |
| FFS28 Fire is almost part of my personality | 1.2568 | .57024 | 176.9907 | .570 | .963 |
| FFS29 I don't need fire (reverse coded) | 2.3509 | 1.15078 | 175.8966 | .361 | .963 |
| FFS30 Fire is an important part of my identity | 1.2739 | .57724 | 176.9736 | .562 | .963 |
| R_FIRS2 Watching an ordinary coal, wood, or gas fire burn | 3.7332 | .77350 | 174.5143 | .240 | .963 |
| R_FIRS3 Watching a bonfire outdoors, like on bonfire night | 3.8245 | .83415 | 174.4230 | .326 | .963 |
| R_FIS1 I like to watch and feel fire | 2.4886 | 1.16342 | 175.7589 | .597 | .963 |
| R_FIS2 I get excited thinking about fire | 1.6348 | .82304 | 176.6127 | .686 | .962 |
| R_FIS3 I like watching fire | 2.8131 | 1.19809 | 175.4344 | .613 | .963 |
| R_FIS5 I like to feel the heat from fire | 3.0528 | 1.16703 | 175.1947 | .497 | .963 |
| R_FIS6 I am fascinated by fire | 2.1398 | 1.10563 | 176.1077 | .668 | .962 |
| R_FIS7 I have a strong interest in fire | 1.7632 | .90891 | 176.4843 | .679 | .962 |
| R_FIS8 I am attracted to fire | 2.0107 | 1.05618 | 176.2368 | .670 | .962 |
| R_FIS10 I find fire intriguing | 2.4451 | 1.19249 | 175.8024 | .653 | .962 |
| NFQ22 Lighting a fire or a couple of candles can make a room look nicer | 4.0350 | .83606 | 174.2126 | .202 | .963 |
| NFQ27 I like watching fire | 2.9722 | 1.21021 | 175.2753 | .621 | .962 |
| NFQ28 Watching even a small fire makes me happy | 2.1862 | 1.08207 | 176.0613 | .692 | .962 |
| NFQ35 If I ever see a garden fire or bonfire unexpectedly I stay to watch it | 2.2019 | 1.09436 | 176.0456 | .583 | .963 |
| NFQ36 The best thing about fire is watching the colours and flames | 3.1163 | 1.19899 | 175.1312 | .497 | .963 |
| NFQ38 I am mesmerised by fire | 2.1997 | 1.14791 | 176.0478 | .645 | .962 |
| NFQ45 I like the smell of smoke from a fire | 2.1769 | 1.22668 | 176.0706 | .429 | .963 |
| NFQ46 I enjoy seeing how fire melts/destroys things | 2.0136 | 1.14998 | 176.2340 | .640 | .962 |
| NFQ57 I find any fire I look at incredibly soothing | 2.1776 | 1.06892 | 176.0699 | .638 | .962 |
| NFQ65 I always feel better when I am looking at a fire | 1.9765 | 1.03481 | 176.2710 | .696 | .962 |
| NFQ66 For me, fire is comforting | 2.3502 | 1.15811 | 175.8973 | .610 | .963 |
| FFS14 I know a lot about how to prevent fires | 3.2076 | 1.01263 | 175.0399 | .190 | .964 |
| NFQ4 If my room caught fire, I would have the skills to get out safely | 3.2454 | .93759 | 175.0021 | .278 | .963 |
| NFQ5 People would turn to me for help if a fire broke out | 2.4344 | .99264 | 175.8131 | .306 | .963 |
| NFQ6 I know how to stop a fire from spreading | 2.8295 | 1.03826 | 175.4180 | .338 | .963 |
| NFQ7 If a fire broke out I would be able to stay cool under the pressure | 2.8524 | .99335 | 175.3951 | .351 | .963 |
| NFQ8 I know a lot about fire safety | 3.0949 | 1.01114 | 175.1526 | .224 | .963 |
| NFQ9 If a fire broke out in my home I would panic and not know what to do (reverse coded) | 3.1947 | 1.06660 | 175.0528 | .191 | .964 |
| NFQ10 I could teach others a lot about fire safety | 2.5735 | 1.06764 | 175.6740 | .310 | .963 |
| NFQ67 If I set a fire, I would have the skills to control it | 2.1997 | 1.07069 | 176.0478 | .419 | .963 |
| R_FIRS7 Watching a house burn down | 1.3966 | .67983 | 176.8509 | .412 | .963 |
| R_FIRS9 Watching people run from a fire | 1.4080 | .60135 | 176.8395 | .374 | .963 |
| R_FIRS12 Seeing a hotel on fire in the TV news | 1.8010 | .72651 | 176.4465 | .364 | .963 |
| R_FIRS13 Seeing firemen hosing a fire | 2.6583 | .88663 | 175.5892 | .448 | .963 |
| NFQ3 I have always felt like my relationship with fire is different to that of other people | 1.4408 | .74596 | 176.8067 | .512 | .963 |
| NFQ29 If I was watching an empty building catch fire, I would be disappointed if the fire brigade showed up | 1.3167 | .67344 | 176.9308 | .503 | .963 |
| NFQ31 I feel like I am more interested in fire than other people | 1.4772 | .78792 | 176.7703 | .668 | .963 |
| NFQ32 I sometimes worry that I am too excited by fire | 1.2989 | .61493 | 176.9486 | .576 | .963 |
| NFQ40 I am more interested in watching fire than the average person | 1.6526 | .89324 | 176.5949 | .704 | .962 |
| NFQ44 I have sometimes downplayed my interest in fire to other people | 1.3866 | .66442 | 176.8609 | .570 | .963 |
| NFQ56 Setting a deliberate fire would calm me down if I were stressed | 1.2611 | .58925 | 176.9864 | .579 | .963 |
| NFQ58 Messing around with fire takes my mind off things that are bothering me | 1.3645 | .70824 | 176.8830 | .632 | .963 |
| NFQ59 I set fires to unwind | 1.2261 | .58125 | 177.0214 | .460 | .963 |
| NFQ60 Looking at fire is the only thing that calms me down | 1.2582 | .54787 | 176.9893 | .514 | .963 |
| NFQ61 For me, setting a deliberate fire gets rid of tension | 1.2789 | .63670 | 176.9686 | .576 | .963 |
| NFQ64 If I had a problem, setting a small fire would make me feel a lot better | 1.2932 | .62343 | 176.9544 | .594 | .963 |
| NFQ78 Setting a deliberate fire is the best way to send people a strong message | 1.3524 | .69665 | 176.8951 | .473 | .963 |
| NFQ80 Setting a deliberate fire is a good way to show people not to mess with you | 1.3702 | .72030 | 176.8773 | .496 | .963 |
| NFQ82 Setting a deliberate fire is a good way to show people whoäó»s boss | 1.2532 | .56870 | 176.9943 | .520 | .963 |
| NFQ83 Setting a deliberate fire is a powerful way of getting back at someone | 1.7097 | 1.11150 | 176.5378 | .418 | .963 |
| NFQ84 If someone sets a deliberate fire, other people realise they need to pay attention to what that person has to say | 1.8203 | 1.00061 | 176.4272 | .383 | .963 |
| NFQ86 People respect you if they think you might set a deliberate fire | 1.2382 | .54781 | 177.0093 | .460 | .963 |
| NFQ87 Setting a deliberate fire sends a powerful message of revenge | 2.0271 | 1.24826 | 176.2204 | .394 | .963 |
| NFQ88 When someone sets a deliberate fire, other people give them the kind of attention they were looking for | 1.8959 | 1.02669 | 176.3516 | .349 | .963 |
| NFQ89 Setting a deliberate fire allows me to be taken seriously | 1.2696 | .56806 | 176.9779 | .480 | .963 |
| NFQ91 For me, fire is a powerful tool for getting your own way | 1.3067 | .62320 | 176.9408 | .516 | .963 |
| NFQ92 If a person mentions setting a deliberate fire, people do what that persons wants | 1.6241 | .79475 | 176.6234 | .324 | .963 |
| NFQ93 Making threats about setting a deliberate fire is the best way to scare others | 1.6227 | .93447 | 176.6248 | .332 | .963 |
| NFQ94 Fire will get a person what they want | 1.3188 | .58196 | 176.9287 | .480 | .963 |
| NFQ95 Setting a deliberate fire is a great way to get revenge | 1.4016 | .77934 | 176.8459 | .514 | .963 |
| NFQ97 I imagine that setting a fire would be a good way of ending your own life | 1.3680 | .76135 | 176.8795 | .200 | .963 |
| NFQ109 Setting a deliberate fire is a good way of telling people you need help | 1.5300 | .85628 | 176.7175 | .420 | .963 |
| NFQ111 Setting a deliberate fire is a good way to show people how you feel | 1.3167 | .61818 | 176.9308 | .515 | .963 |
| NFQ112 Setting a deliberate fire gets you the help you need | 1.4208 | .70973 | 176.8267 | .475 | .963 |
| NFQ114 Fire will get me attention | 2.0128 | 1.17424 | 176.2347 | .377 | .963 |
| NFQ115 Setting a deliberate fire is a good way to tell people you need help | 1.4929 | .81493 | 176.7546 | .429 | .963 |
| NFQ116 Unexpected fires are useful because they create a scene | 1.4372 | .74662 | 176.8103 | .544 | .963 |
| NFQ117 Fire is a great way to show your distress to others | 1.4108 | .73135 | 176.8367 | .504 | .963 |
| R_FIRS4 Seeing firemen get their equipment ready | 2.8260 | .75638 | 175.4215 | .357 | .963 |
| R_FIRS5 Watching a fire engine come down the road | 2.7404 | .81889 | 175.5071 | .369 | .963 |
| NFQ47 Seeing the fire service attending a fire is exciting | 2.2496 | 1.14808 | 175.9979 | .570 | .963 |
| NFQ48 I love watching fire fighters putting out fire | 2.1655 | 1.06183 | 176.0820 | .568 | .963 |
| NFQ50 I feel excited when I hear fire engine sirens | 1.7347 | .93519 | 176.5128 | .592 | .963 |
| NFQ51 I stop to watch fire engines when I see them coming down the road | 2.2675 | 1.17513 | 175.9800 | .419 | .963 |
| NFQ52 I get excited when I see fire fighters turning up to a fire | 1.9180 | 1.01014 | 176.3295 | .585 | .963 |
| NFQ53 I am more interested in fire engines than the average person | 1.4807 | .71787 | 176.7668 | .547 | .963 |
| NFQ54 I am more interested in the fire service/brigade than the average person | 1.5029 | .76341 | 176.7447 | .558 | .963 |
| NFQ55 I often find myself staring at a fire engine if I see one | 1.9914 | 1.11888 | 176.2561 | .437 | .963 |

Note: Overall item mean = 1.959 (SD = 0.675), min avg = 1.165, max avg = 4.035

Supplemental Figure S1

*Histogram Firesetting Questionnaire Total*


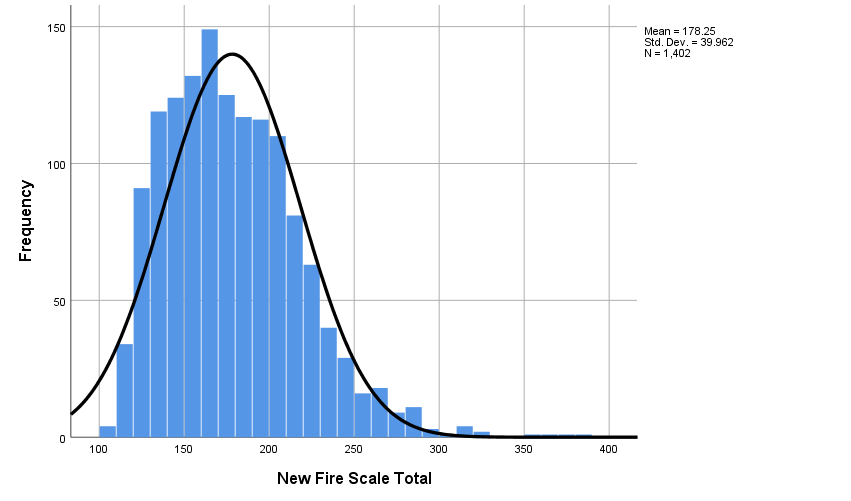

Supplement: MOESM1 [file 23833480]
